# Supplementary material for: Engineering the surface of graphene oxide with bovine serum albumin for improved biocompatibility inCaenorhabditis elegans
Source: Royal Society of Chemistry journal article supplement (doi:10.1039/d0na00574f), 2020-01-01
Supplement: d0na00574f1.pdf [file d0na00574f1.pdf]

Electronic Supplementary Information

**Engineering the surface of graphene oxide with bovine serum albumin for improved biocompatibility in *Caenorhabditiselegans***

S. Sivaselvam,<sup>a</sup> A. Mohankumar,<sup>b</sup> G. Thiruppathi,<sup>b</sup> P. Sundararaj,<sup>b</sup> C. Viswanathan<sup>a</sup> and N. Ponpandian.<sup>a,\*</sup>

<sup>a</sup>*Department of Nanoscience and Technology, Bharathiar University, Coimbatore 641 046, India*

<sup>b</sup>*Department of Zoology, Bharathiar University, Coimbatore 641 046, India.*

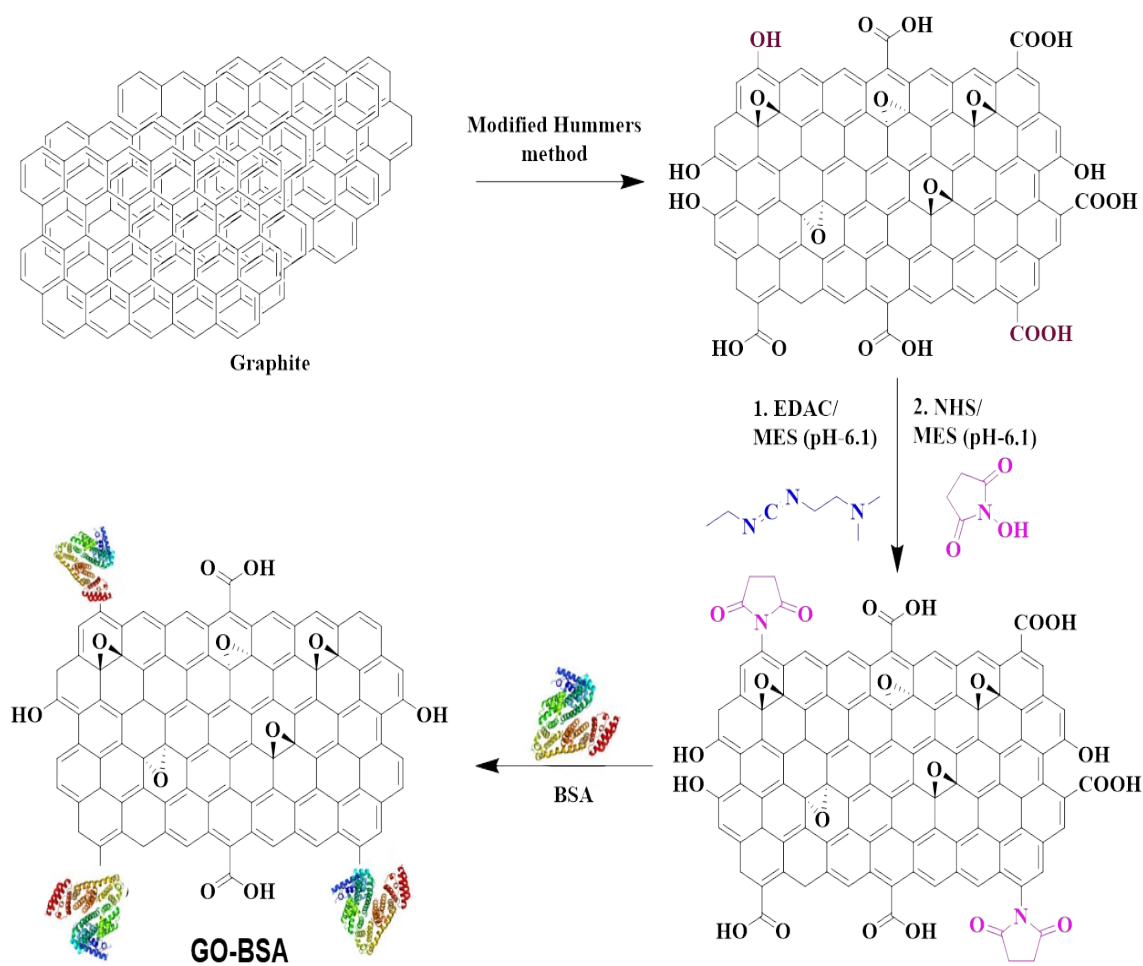

**Figure S1.** Schematic representation for the preparation of bovine serum albumin decorated graphene oxide (GO-BSA).

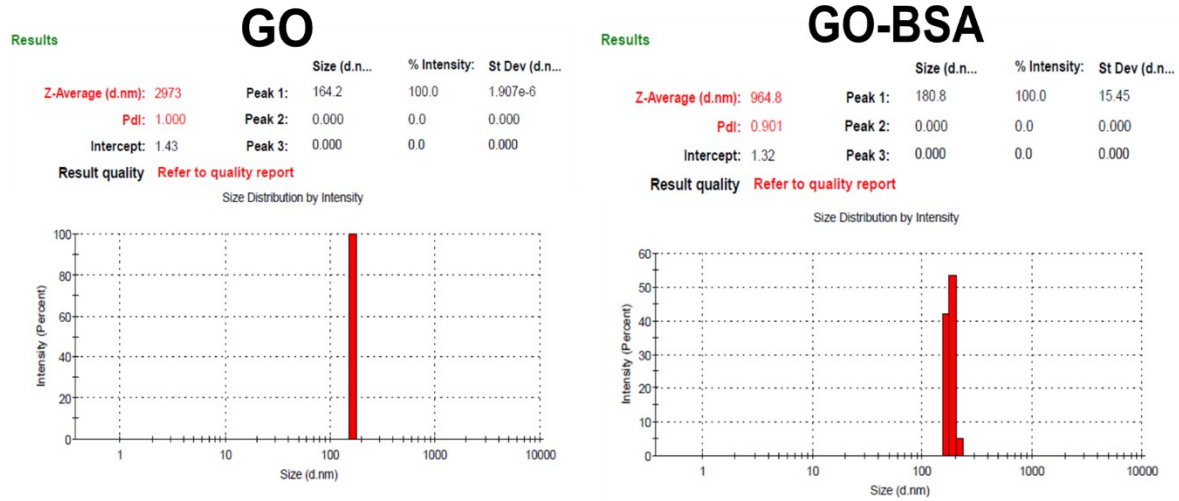

**Figure S2.** Size distribution analysis of GO and GO-BSA.

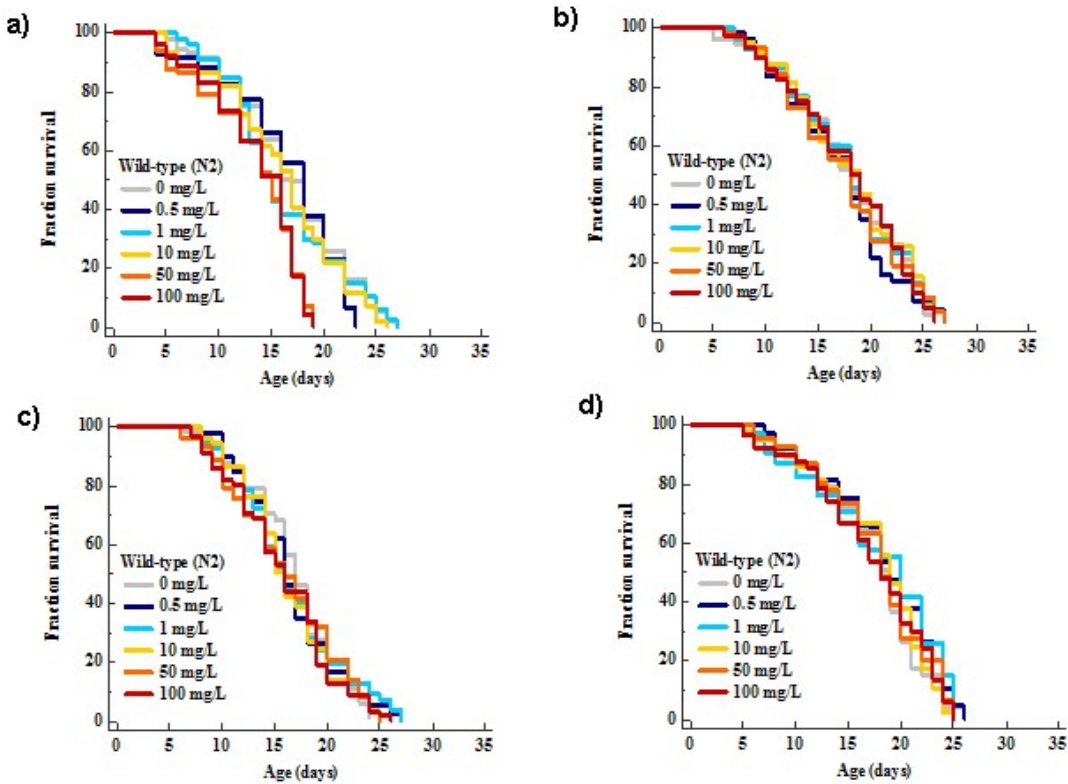

**Figure S3.** Effect of GO and GO-BSA exposure on the lifespan of wild-type *C. elegans*. Survival curves of wild-type worms under (a) acute GO (b) acute GO-BSA, (c) Prolonged GO, and (d) prolonged GO-BSA exposures at 20°C. The representative Kaplan–Meier survival curves from three independent biological trials were presented.

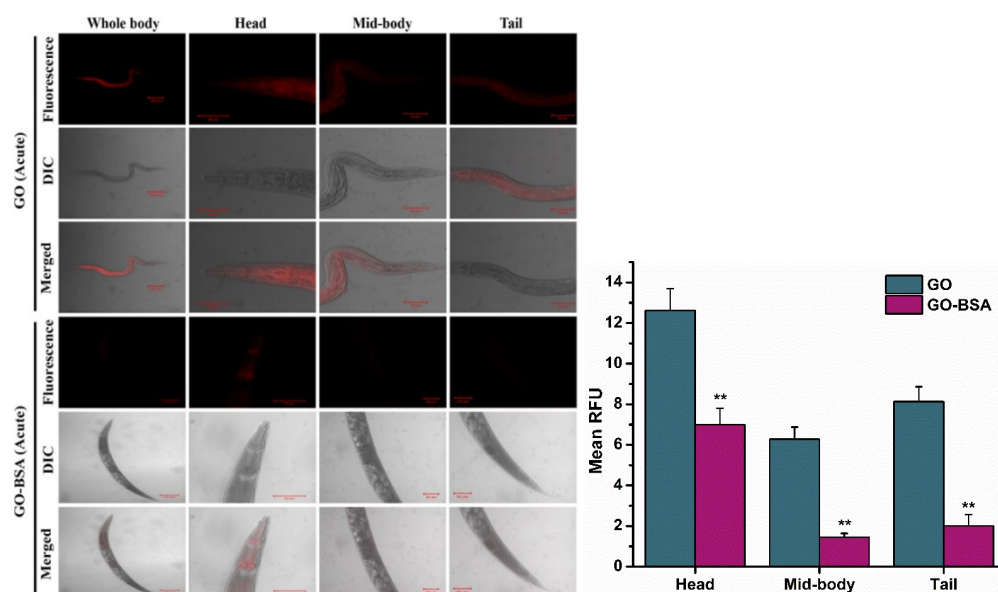

**Figure S4.** Distribution of GO and GO-BSA after acute exposure in *C. elegans*. Fluorescence micrograph showing the bio-distribution of Rhodamine-B loaded GO and GO-BSA after acute exposure of 100 mg L<sup>-1</sup> in nematodes and the quantification of Rhodamine-B loaded GO and GO-BSA fluorescence in different parts of nematodes. Error bar indicates the mean value of three independent experimental data (n≥20/experiment). \*\*p<0.01.

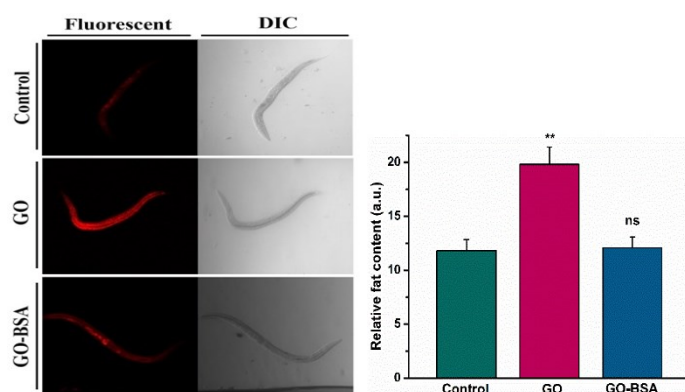

**Figure S5.** Effect of GO and GO-BSA (100 mg L<sup>-1</sup>) on intestinal permeability in *C. elegans*. Fluorescent micrograph showing the intestinal permeability of GO and GO-BSA after acute exposure and its quantification of relative fluorescent intensity. Error bar indicates the mean value of three independent experimental data (n≥30/experiment). \*\*p<0.01, ns-not significant.

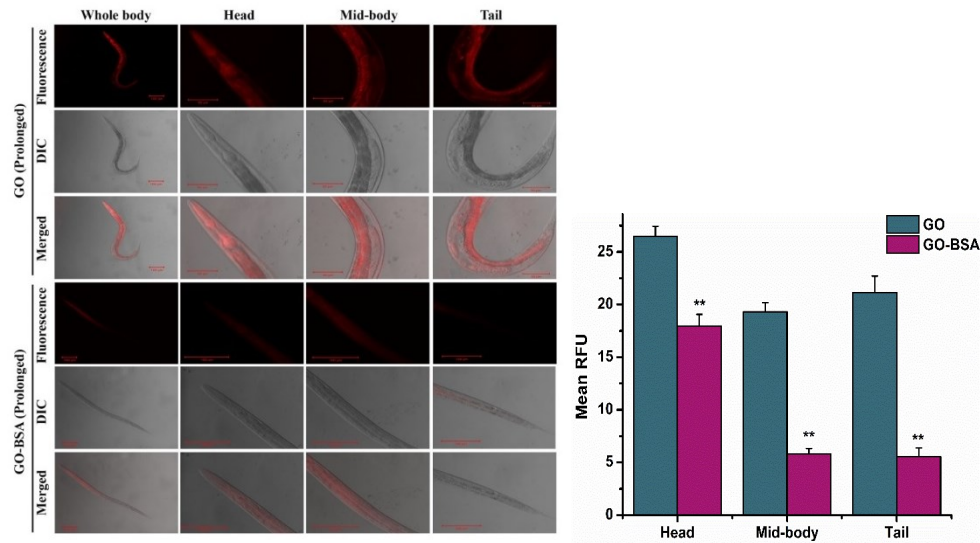

**Figure S6.** Distribution of GO and GO-BSA ( $100 \text{ mg L}^{-1}$ ) in wild-type *C. elegans*. Fluorescence micrograph showing the bio-distribution of Rhodamine-B loaded GO and GO-BSA after prolonged exposure in wild-type nematodes and its representative quantification of Rhodamine-B loaded GO and GO-BSA fluorescence in different parts of nematodes. Error bar indicates the mean value of three independent experimental data ( $n \geq 20/\text{experiment}$ ). \*\* $p < 0.01$ .

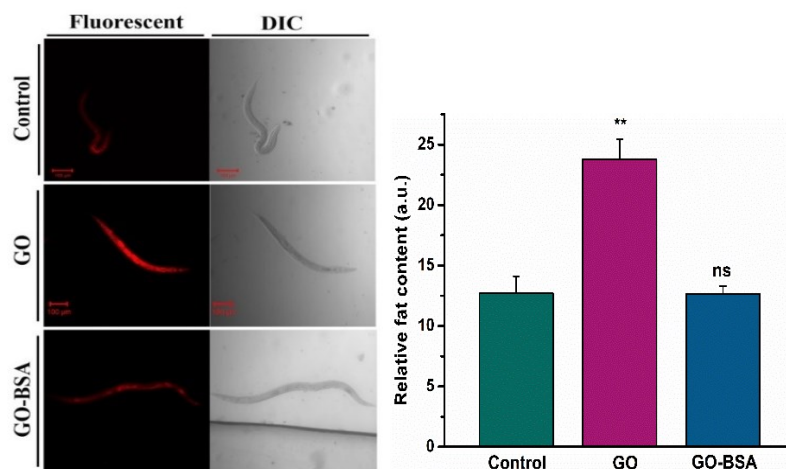

**Figure S7.** Effect of GO and GO-BSA ( $100 \text{ mg L}^{-1}$ ) on intestinal permeability in *C. elegans* (N2 worms). (a) Fluorescence micrograph showing the intestinal permeability of GO and GO-BSA after prolonged exposure in *C. elegans* and its representative quantification of relative fluorescent intensity of Nile red in exposed nematodes. Error bar indicates the mean value of three independent experimental data ( $n \geq 20/\text{experiment}$ ). \*\* $p < 0.01$ , ns-not significant.

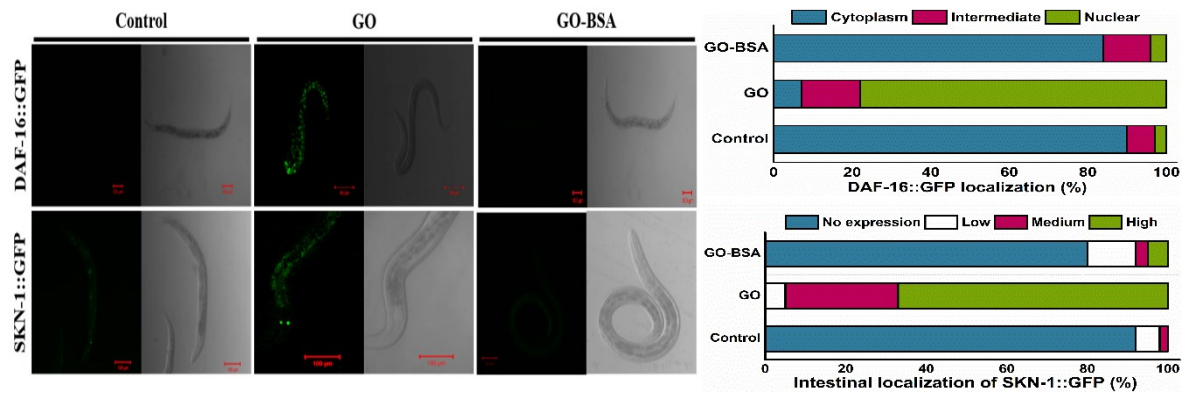

**Figure S8.** Effect of GO and GO-BSA (100 mg L<sup>-1</sup>) on expression of antioxidant defense genes in *C. elegans*. Representative fluorescent image showing the localization of *daf-16::GFP* and *skn-1::GFP* in *C. elegans* and its respective quantification of nuclear localization after prolonged exposure to GO and GO-BSA. Error bar indicates the mean value of three independent experimental data (n=20/experiment). \*\*p<0.01.

**Table S1.** Survival rate of wild-type *C. elegans* cultured on NGM plates carrying either GO or GO-BSA. The mean lifespan of *C. elegans* were calculated using Kaplan–Meir survival analysis and significance levels were estimated by long-rank test in Medcalc statistical tool.

| Treatment                     |                      | Mean survival<br>(Mean±SEM) | Maximum lifespan<br>(days) | Sample size (N) | Censored | % Change  | p value |
|-------------------------------|----------------------|-----------------------------|----------------------------|-----------------|----------|-----------|---------|
| <b>GO<br/>(acute)</b>         | <b>Concentration</b> |                             |                            |                 |          |           |         |
|                               | 0 mg/L               | 16.723±0.387                | 24                         | 136             | 16       |           |         |
|                               | 0.5 mg/L             | 16.456±0.405                | 27                         | 130             | 9        | (-) 1.60  | 0.6067  |
|                               | 1 mg/L               | 16.475±0.432                | 27                         | 142             | 15       | (-) 1.48  | 0.9475  |
|                               | 10 mg/L              | 16.136±0.399                | 25                         | 126             | 7        | (-) 3.51  | 0.3777  |
|                               | 50 mg/L              | 16.028±0.466                | 26                         | 130             | 13       | (-) 4.16  | 0.7338  |
|                               | 100 mg/L             | 15.750±0.401                | 26                         | 148             | 10       | (-) 5.82  | 0.3646  |
| <b>GO<br/>(prolonged)</b>     | 0 mg/L               | 16.908±0.476                | 27                         | 145             | 17       |           |         |
|                               | 0.5 mg/L             | 16.348±0.496                | 23                         | 128             | 17       | (-) 3.31  | 0.1391  |
|                               | 1 mg/L               | 16.074±0.486                | 27                         | 132             | 16       | (-) 4.93  | 0.2013  |
|                               | 10 mg/L              | 15.996±0.493                | 26                         | 141             | 13       | (-) 5.39  | 0.1393  |
|                               | 50 mg/L              | 13.382±0.375                | 19                         | 154             | 15       | (-) 20.85 | 0.0001  |
|                               | 100 mg/L             | 13.630±0.390                | 19                         | 125             | 14       | (-) 22.39 | 0.0001  |
| <b>GO-BSA<br/>(acute)</b>     | 0 mg/L               | 17.566±0.514                | 26                         | 126             | 16       |           |         |
|                               | 0.5 mg/L             | 17.036±0.480                | 27                         | 122             | 13       | (-) 3.02  | 0.1156  |
|                               | 1 mg/L               | 17.709±0.478                | 26                         | 135             | 17       | (+) 0.81  | 0.3697  |
|                               | 10 mg/L              | 17.807±0.499                | 27                         | 130             | 18       | (+) 1.37  | 0.5234  |
|                               | 50 mg/L              | 17.277±0.524                | 26                         | 118             | 13       | (-) 1.65  | 0.3149  |
|                               | 100 mg/L             | 17.730±0.498                | 27                         | 132             | 19       | (+) 0.93  | 0.2757  |
| <b>GO-BSA<br/>(prolonged)</b> | 0 mg/L               | 17.547±0.453                | 26                         | 127             | 16       |           |         |
|                               | 0.5 mg/L             | 18.376±0.460                | 26                         | 138             | 17       | (+) 4.72  | 0.1228  |
|                               | 1 mg/L               | 17.973±0.570                | 25                         | 118             | 22       | (+) 2.43  | 0.0934  |
|                               | 10 mg/L              | 17.724±0.461                | 25                         | 133             | 17       | (+) 1.01  | 0.7234  |
|                               | 50 mg/L              | 17.723±0.447                | 25                         | 138             | 19       | (+) 1.00  | 0.7458  |
|                               | 100 mg/L             | 17.314±0.474                | 25                         | 145             | 20       | (-) 1.33  | 0.9751  |

**Table S2.** Primers used for qRT-PCR analysis.

| S. No | Gene         | Sequence (5'→3')      |                      |
|-------|--------------|-----------------------|----------------------|
|       |              | Forward               | Reverse              |
| 1     | <i>act-1</i> | ACCATGTACCCAGGAATTGC  | TGGAAGGTGGAGAGGGAAG  |
| 2     | <i>ced-3</i> | ACGGGAGATCGTGAAAGC    | AGAGTTGGCGGATGAAGG   |
| 3     | <i>ced-4</i> | CTGATGCTAGCCCGTGTGT   | CGTTGCTGGATTTCCACTGC |
| 4     | <i>ced-9</i> | GCTGTTTCATCAAAACGCGGA | ATCGACCACCGTCTGTTCTG |
| 5     | <i>cep-1</i> | GTCGGAACCCAAGTGTAT    | CGAGTTACCTGCCTACAA   |
| 6     | <i>egl-1</i> | CACCTTTGCCTCAACCTC    | TTGGAGCCGATCTCGTAG   |
| 7     | <i>hus-1</i> | GCGGCAATCGACGTGTTTAT  | CCGGGCAGAACACGTACTAA |
